# Supplementary material for: Strain versus Tunable Terahertz Nanogap Width: A Simple Formula and a Trench below
Source: MDPI journal article supplement (doi:10.3390/nano13182526), 2023-09-09
Supplement: s1 [file s1]

# Supplementary Materials for

## Strain versus Tunable Terahertz Nanogap Width: A Simple Formula and a Trench below

Hwanhee Kim <sup>1</sup>, Mahsa Haddadi Moghaddam <sup>1</sup>, Zhihao Wang <sup>1</sup>, Sunghwan Kim <sup>1</sup>, Dukhyung Lee <sup>1</sup>, Hyosim Yang <sup>1</sup>, Myongsoo Jee <sup>2</sup>, Daehwan Park <sup>1</sup> and Dai-Sik Kim <sup>1,\*</sup>

<sup>1</sup> Department of Physics, Ulsan National Institute of Science and Technology (UNIST), Ulsan 44919, Republic of Korea; psikvv@unist.ac.kr (H.K.)

<sup>2</sup> Quantum Republic Co., Ltd., Rm 805-6 Bldg 106, UNIST-gil, Eonyang-eup, Ulju-gun, Ulsan 44919, Republic of Korea

\* Correspondence: daisikkim@unist.ac.kr

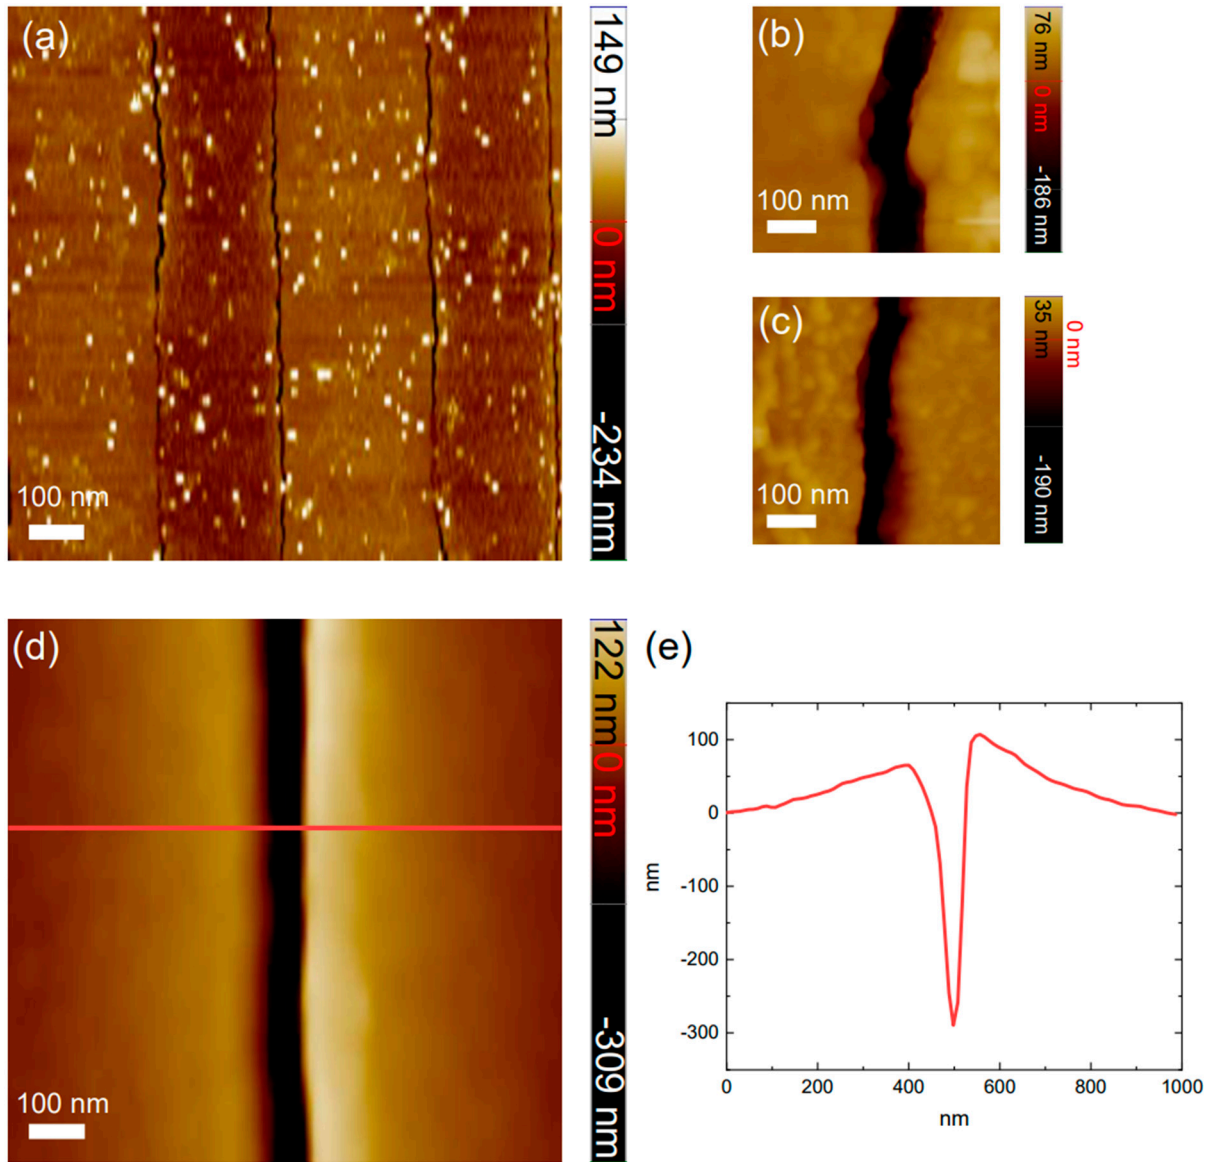

**Figure S1.** (a) shows the  $20\ \mu\text{m} \times 20\ \mu\text{m}$  size topography zero-gap after etching the gold in 0 % strain. (b) is same topography Figure 2 (d). (c) depicts a close-up view of one of the trenches in (a). (d) shows the gold gap topography of the bent zero-gap in stage displacement  $900\ \mu\text{m}$  (strain = 1.79 %). (e) is the line profile along the red line in (d).
